# Supplementary material for: Preparation and characterization of surface molecularly imprinted films coated on multiwall carbon nanotubes for recognition and separation of lysozyme with high binding capacity and selectivity
Source: Royal Society of Chemistry journal article supplement (doi:10.1039/c6ra28063c), 2017-01-01

Fig. S1. TGA curves for MWNTs-COOH@CS (a), NIPs (b) and Lyz-MIPs (c).

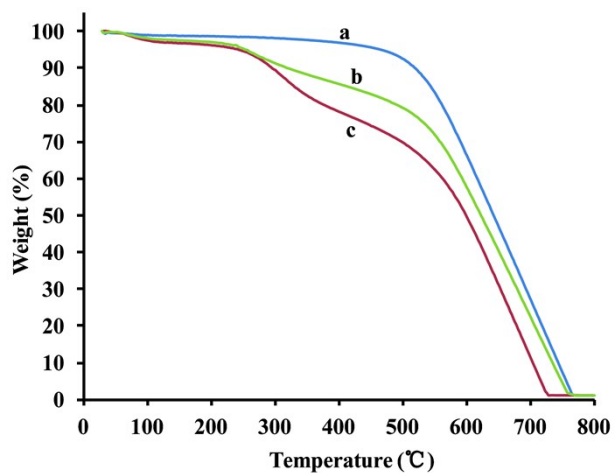

Fig. S2. FTIR spectra of MWNTs-COOH (a), Lyz-MIPs (b) and NIPs (c).

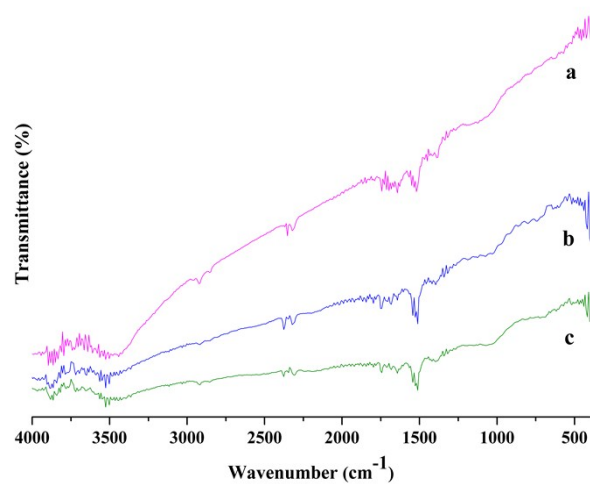

Supplement: c6ra28063c1.pdf [file c6ra28063c1.pdf]
